# Supplementary material for: Novel Sensor-EnabledEx VivoBioreactor: A New Approach towards Physiological Parameters and Porcine Artery Viability
Source: Hindawi journal article supplement (doi:10.1155/2015/958170), 2015-01-01
Supplement: f1 [file 958170.f1.pdf]

# 1. Appendix

## 2. Novel Sensor-Enabled *Ex-Vivo* Bioreactor-A New Approach towards Physiological Parameters and Porcine Artery Viability

3. Raghavendra C. Mundargi, Divya Venkataraman, Saranya Kumar, Vishal Mogal, Raphael Ortiz, Joachim Loo, Subbu Venkatraman and, Terry Steele

4.

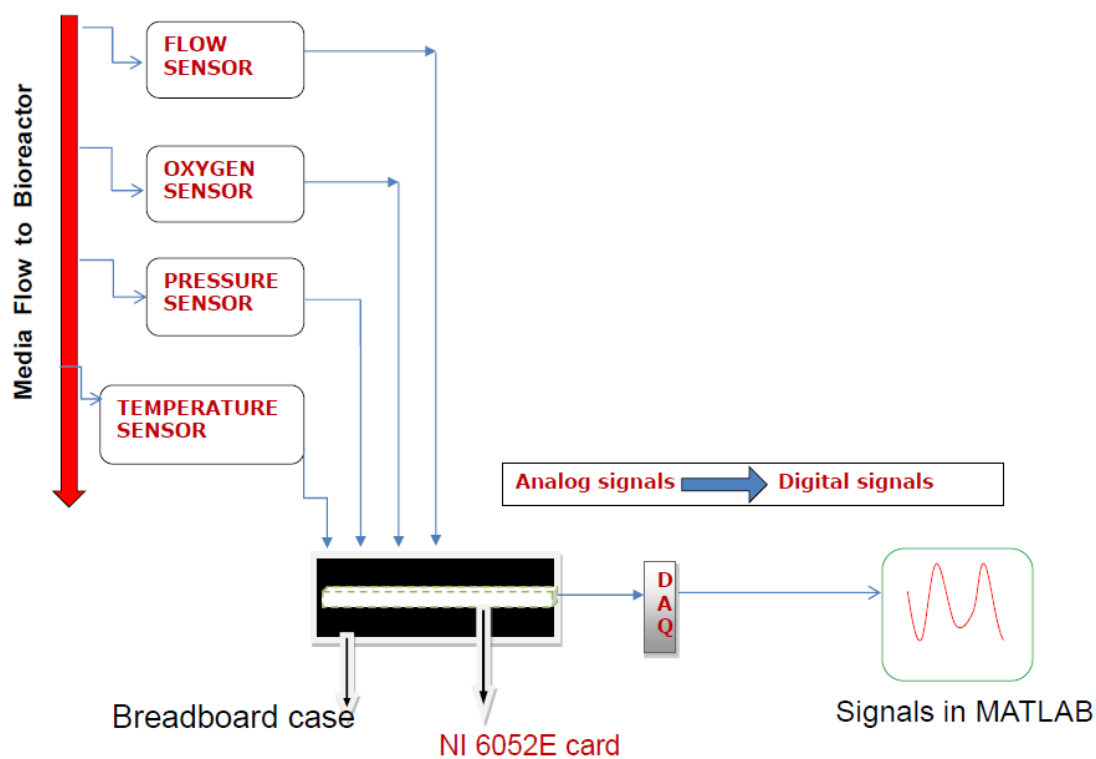

**Figure S1:** Flow diagram for sensors connection to data acquisition card (DAQ).

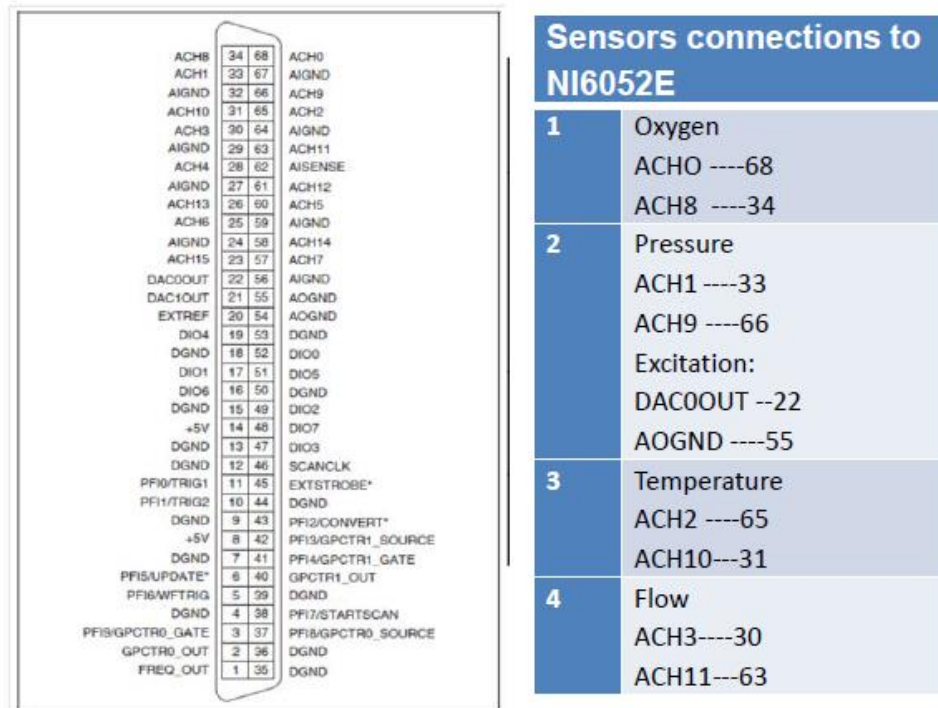

| Sensors connections to NI6052E |                                                                                       |
|--------------------------------|---------------------------------------------------------------------------------------|
| 1                              | Oxygen<br>ACH0 ----68<br>ACH8 ----34                                                  |
| 2                              | Pressure<br>ACH1 ----33<br>ACH9 ----66<br>Excitation:<br>DAC0OUT --22<br>AOGND ----55 |
| 3                              | Temperature<br>ACH2 ----65<br>ACH10----31                                             |
| 4                              | Flow<br>ACH3----30<br>ACH11---63                                                      |

**Figure S2:** I/O connector pin assignment and sensors connections to the NI6052E card.

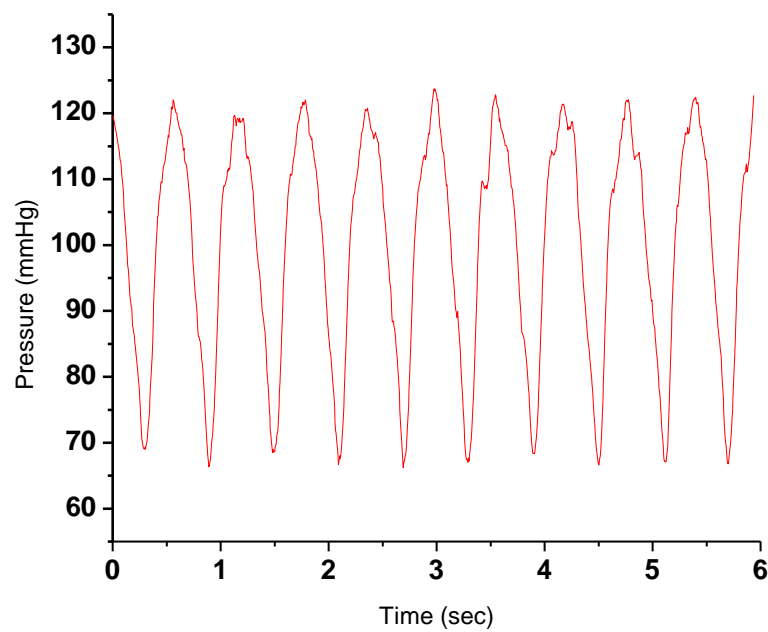

**Figure S3:** Pressure wave forms generated in the sensor-enabled online *ex-vivo* bioreactor.

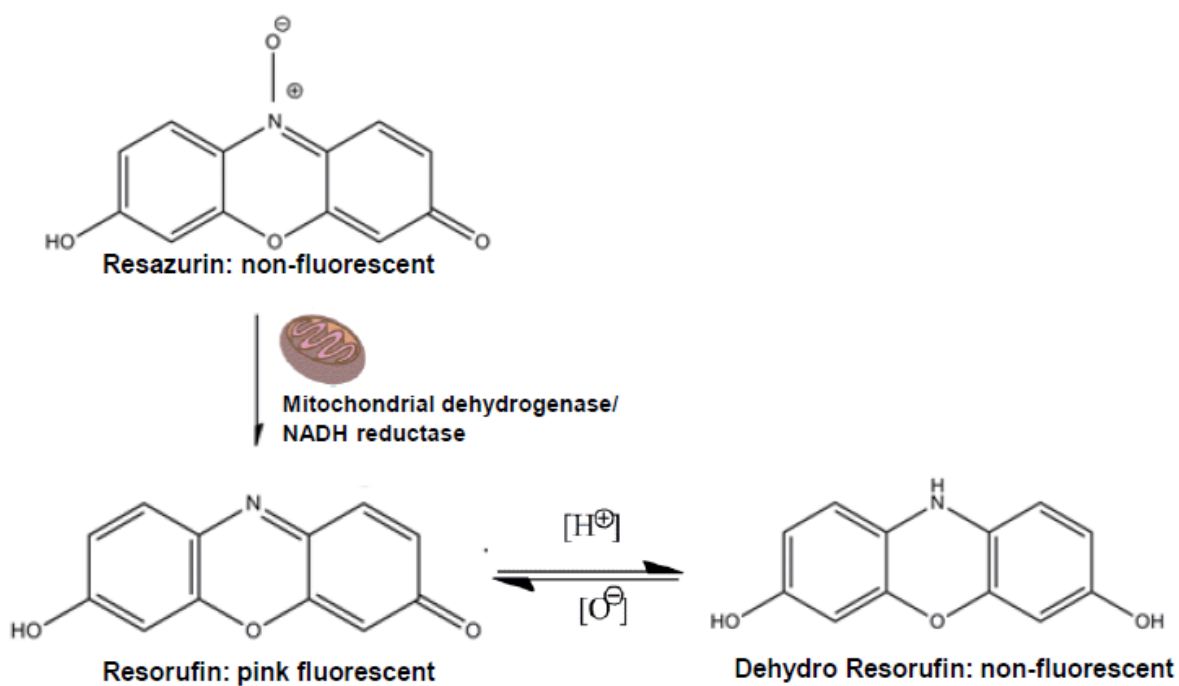

5. **Figure S4:** Schematic showing conversion of resazurin to fluorescent resorufin.
